# Supplementary material
Source: PubMed Central journal article supplement (PMC6759403)
Supplement: NIHMS1045708-supplement-1.pdf [file NIHMS1045708-supplement-1.pdf]

**Supplementary Table S1. Sensitivity analysis using ethnic groups**

| <b>Ethnic group</b> | <b>N (%)</b>  | <b>Bivariable OR<br/>(95% CI)</b> | <b>Multivariable OR<sup>^</sup><br/>(95% CI)</b> |
|---------------------|---------------|-----------------------------------|--------------------------------------------------|
| <b>SSR</b>          |               |                                   |                                                  |
| Chinese             | 29519 (75.1%) | 1.00                              | -                                                |
| Indian              | 2885 (7.3%)   | 1.22 (0.97-1.53)                  |                                                  |
| Malay               | 5577 (14.2%)  | 1.09 (0.91-1.30)                  |                                                  |
| Others              | 1342 (3.4%)   | 1.07 (0.76-1.51)                  |                                                  |
| <b>CRRGSR</b>       |               |                                   |                                                  |
| Caucasian           | 4524 (55.8%)  | 1.00                              | 1.00                                             |
| African-American    | 3461 (42.7%)  | 0.74 (0.62-0.87) **               | 0.84 (0.71-0.99) **                              |
| Asian               | 60 (0.7%)     | 0.52 (0.16-1.67)                  | 0.59 (0.14-1.60)                                 |
| Hispanic            | 30 (0.4%)     | 0.34 (0.05-2.50)                  | 0.40 (0.02-1.92)                                 |
| Others              | 31 (0.4%)     | 0.68 (0.16-2.86)                  | 0.72 (0.12-2.43)                                 |

SSR: Singapore Stroke Registry; CRRGSR: Cognitive Rehabilitation Research Group Stroke Registry; OR: Odds ratio; CI: Confidence interval;  
<sup>^</sup>Multivariable model was adjusted for admission year as well as history of stroke, ischemic heart disease and atrial fibrillation
